# Supplementary material
Source: PubMed Central journal article supplement (PMC8561696)
Supplement: CEI-206-384-s001.pdf [file CEI-206-384-s001.pdf]

**Supporting information, Figure S1:**

**Proportion of indications for first IVIg administration by calendar year**

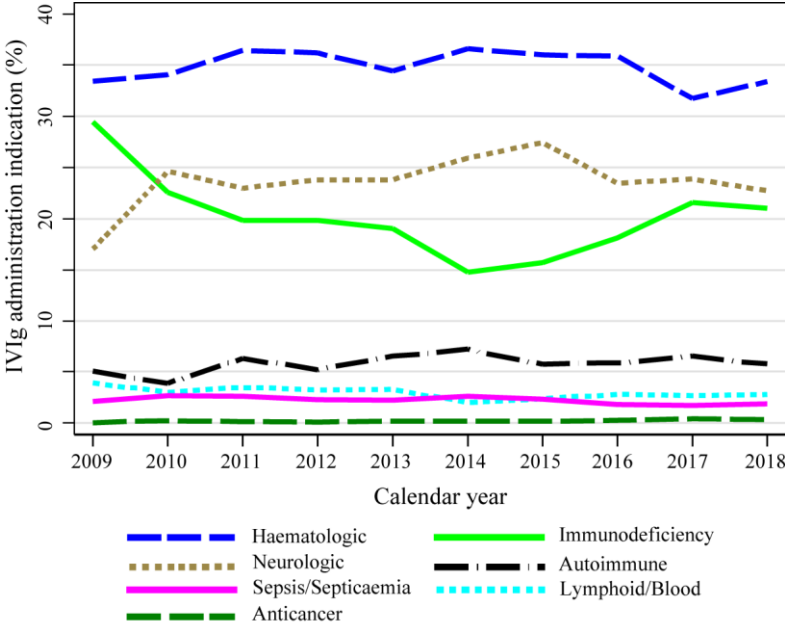

IVIg: Intravenous immunoglobulin

**Supporting information, Table S1:**

**Association between age in adults and first anaphylactic events following IVIg administrations, calendar period 2009-2018.**

|                                   | <b>Anaphylactic events</b> | <b>IVIg administrations</b> | <b>IR per 10,000 IVIg administrations (0.95-CI)</b> | <b>Crude IRR<sup>1</sup> (0.95-CI)</b> | <b>Adjusted IRR<sup>1,2</sup> (0.95-CI)</b> |
|-----------------------------------|----------------------------|-----------------------------|-----------------------------------------------------|----------------------------------------|---------------------------------------------|
| <b>Total IVIg administrations</b> | 89                         | 155909                      | 5.71 (4.58-7.03)                                    |                                        |                                             |
| <b>Predictors</b>                 |                            |                             |                                                     |                                        |                                             |
| <b>Age [years]</b>                |                            |                             |                                                     |                                        |                                             |
| 18-39                             | 16                         | 20398                       | 7.84 (4.48-12.74)                                   | 1                                      | 1                                           |
| 40-59                             | 29                         | 47983                       | 6.04 (4.04-8.68)                                    | 0.77 (0.42-1.43)                       | 0.92 (0.49-1.70)                            |
| 60-74                             | 28                         | 58210                       | 4.81 (3.19-6.96)                                    | 0.61 (0.33-1.14)                       | 0.81 (0.43-1.52)                            |
| ≥75 or unknown                    | 16                         | 29318                       | 5.46 (3.11-8.87)                                    | 0.70 (0.35-1.40)                       | 0.78 (0.38-1.61)                            |

CI: Confidence interval; IR: Incidence rate; IRR: Incidence rate ratio; IVIg: Intravenous immunoglobulin.

<sup>1</sup>: Estimated from Poisson regression models clustering for patients.

<sup>2</sup>: IRR estimates adjusted for age, sex, race, sequence of IVIg treatment, hospital setting, transfusion of blood components, IVIg indication dose group and calendar period.
